# Supplementary material for: Pharmacological Evaluation of the Anticancer Activity of Extracts and Fractions of Lannea barteri Oliv. (Anacardiaceae) on Adherent Human Cancer Cell Lines
Source: PubMed Central journal article supplement (PMC7070605; doi:10.3390/molecules25040849), 2020-02-14
Supplement: molecules-25-00849-s001.pdf [file molecules-25-00849-s001.pdf]

## Supplementary Material

DOI: 10.5277/molecule:171819 link:<https://molecule.org/record/202122>

# Pharmacological Evaluation of the Anticancer Activity of Extracts and Fractions of *Lannea barteri* Oliv. (Anacardiaceae) on Adherent Human Cancer Cell Lines

Florence N. Mbaoji<sup>1,2,\*</sup>, Steven Behnisch-Cornwell<sup>2</sup>, Adaobi C. Ezike<sup>1</sup>, Chukwuemeka S. Nworu<sup>1</sup> and Patrick J. Bednarski<sup>2,\*</sup>

<sup>1</sup> Department of Pharmacology and Toxicology, Faculty of Pharmaceutical Sciences, University of Nigeria, Nsukka, PMB 410001, Enugu State, Nigeria

<sup>2</sup> Institute of Pharmacy, Pharmaceutical and Medicinal Chemistry, University of Greifswald, 17487 Greifswald, Germany;

The RP-HPLC chromatograms of active fractions from *Lannea barteri* Oliv (Anacardiaceae) cold DCM leaf (fractions 1E-1K) and stem bark (fractions 2D-2J) extracts

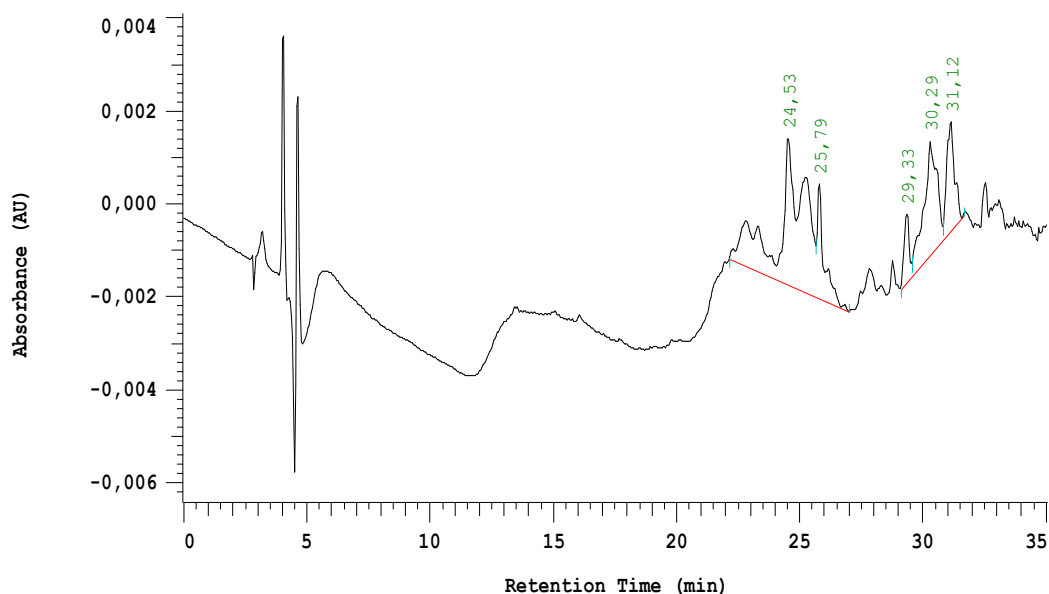

**Figure S1: Chromatogram of fraction 1E.** Chrom Type: Integrated Chromatogram between wavelengths 240 to 260 nm

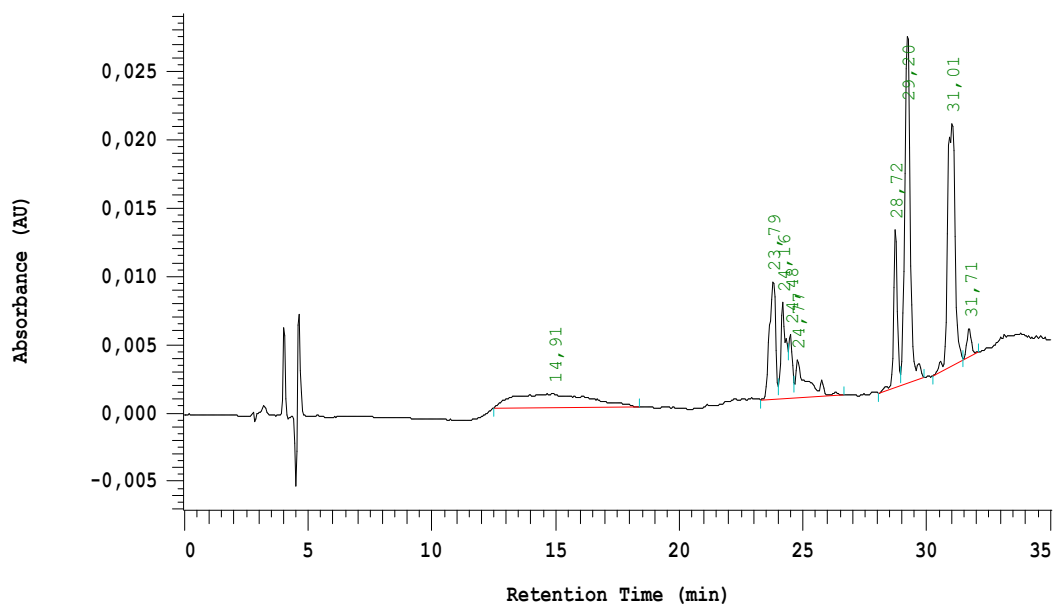

**Figure S2: Chromatogram of fraction 1F.** Chrom Type: Integrated Chromatogram between wavelengths 240 to 260 nm

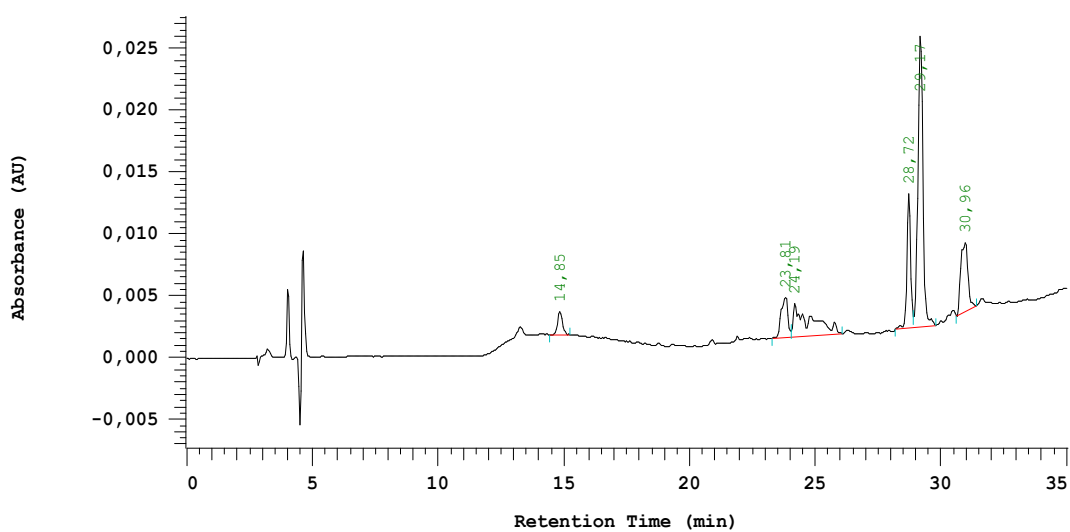

**Figure S3: Chromatogram of fraction 1G.** Chrom Type: Integrated Chromatogram between wavelengths 240 to 260 nm

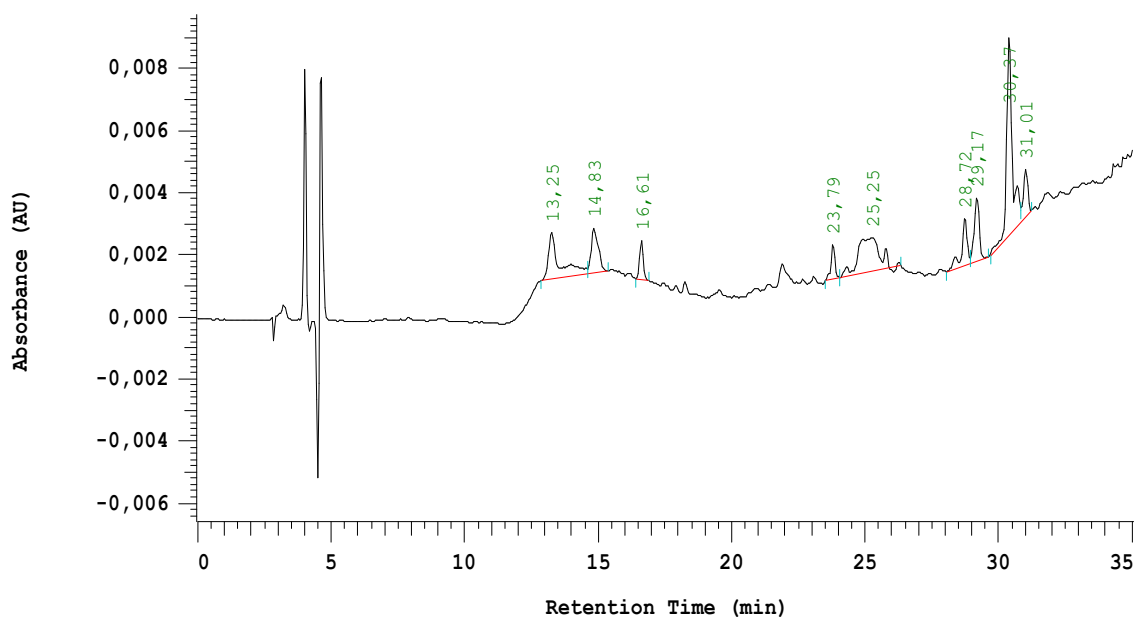

**Figure S4: Chromatogram of fraction 1H.** Chrom Type: Integrated Chromatogram between wavelengths 240 to 260 nm

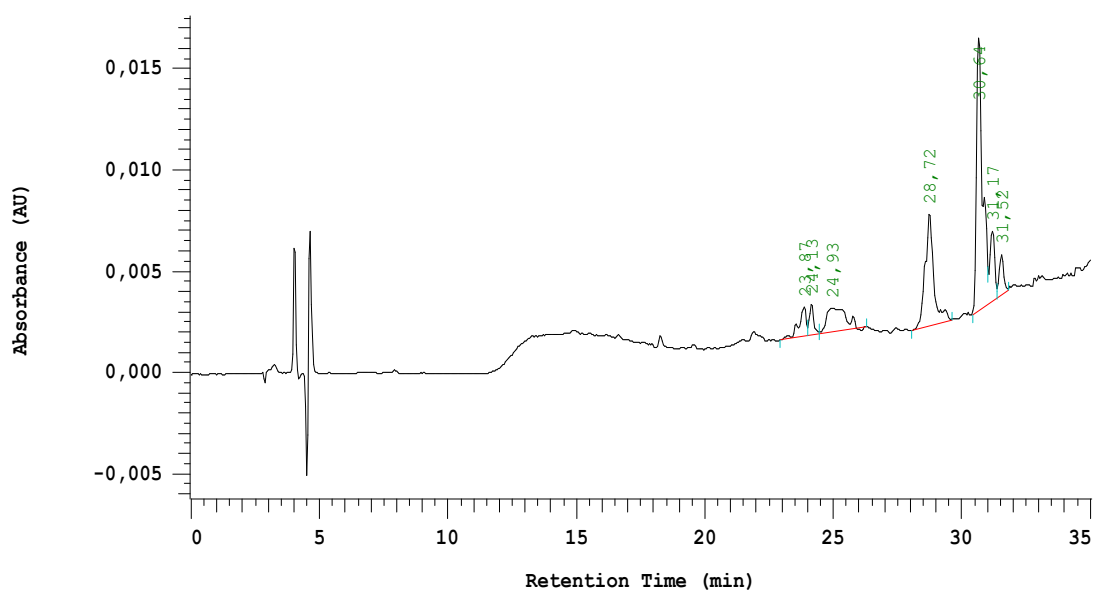

**Figure S5: Chromatogram of fraction 1I.** Chrom Type: Integrated Chromatogram between wavelengths 240 to 260 nm

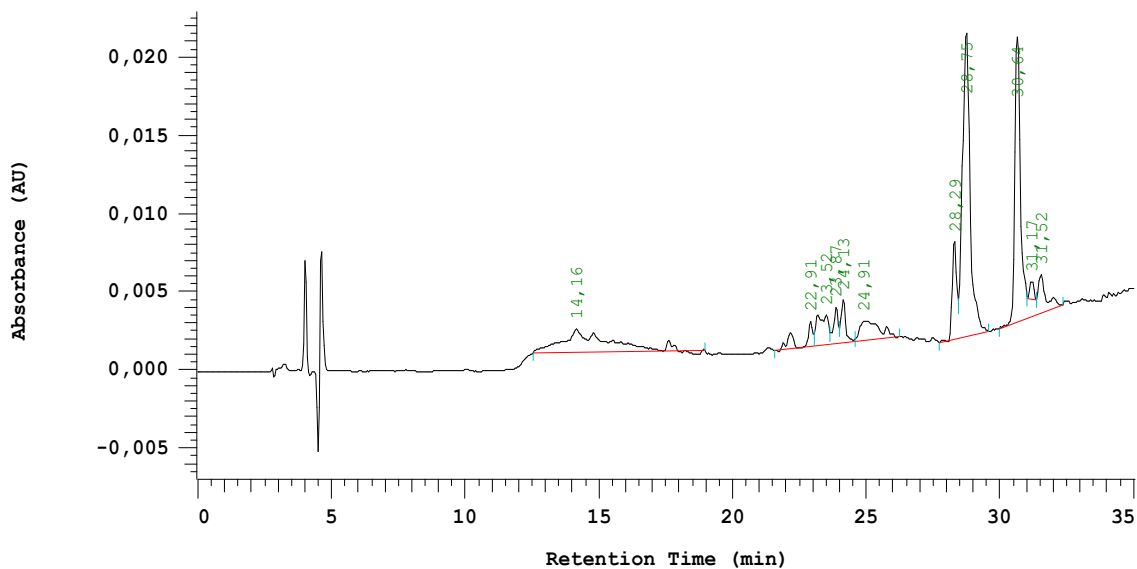

**Figure S6: Chromatogram of fraction 1J.** Chrom Type: Integrated Chromatogram between wavelengths 240 to 260 nm

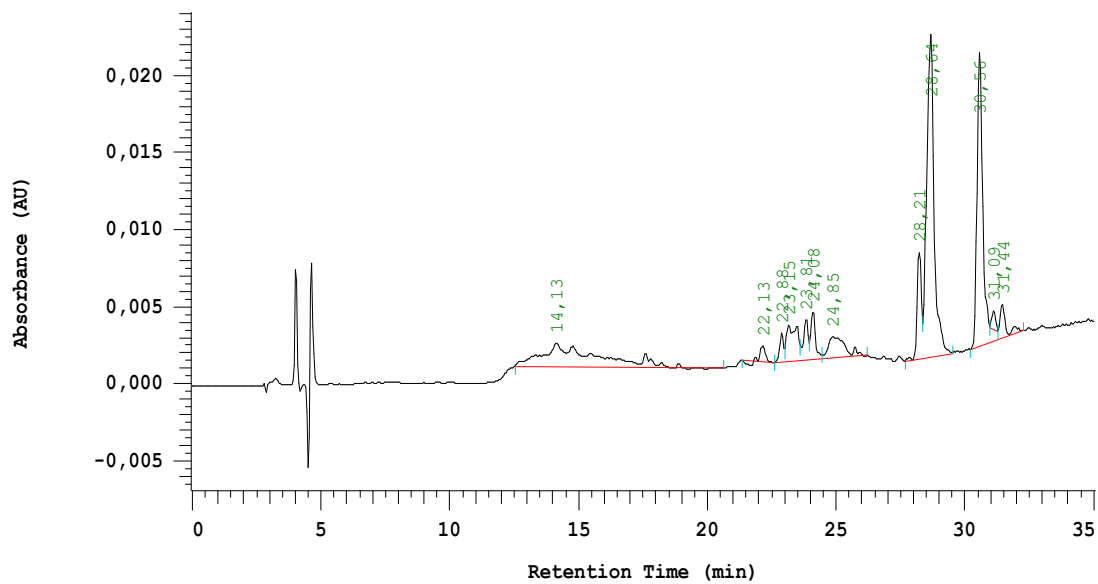

**Figure S7: Chromatogram of fraction 1K.** Chrom Type: Integrated Chromatogram between wavelengths 240 to 260 nm

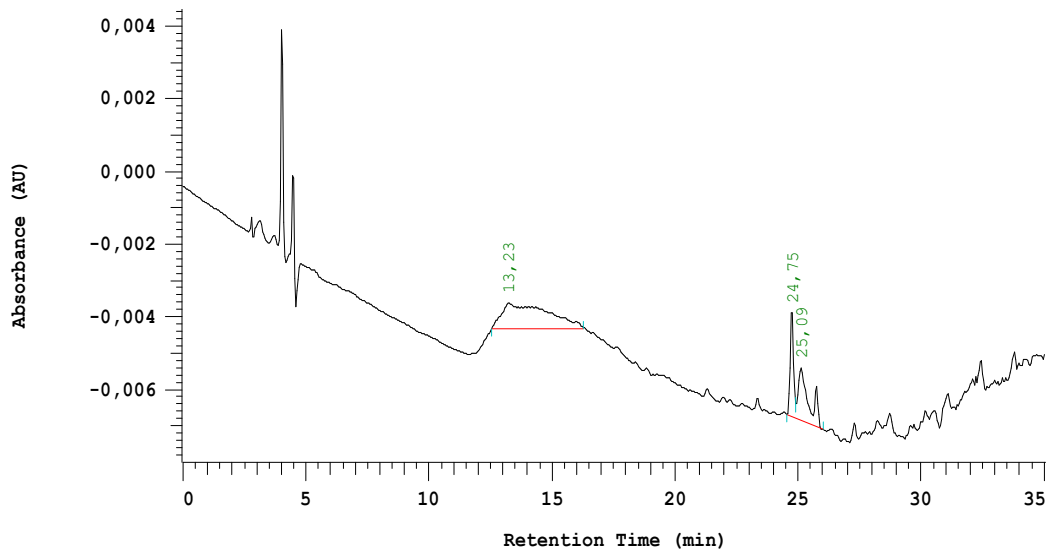

**Figure S8: Chromatogram of fraction 2D.** Chrom Type: Integrated Chromatogram between wavelengths 240 to 260 nm

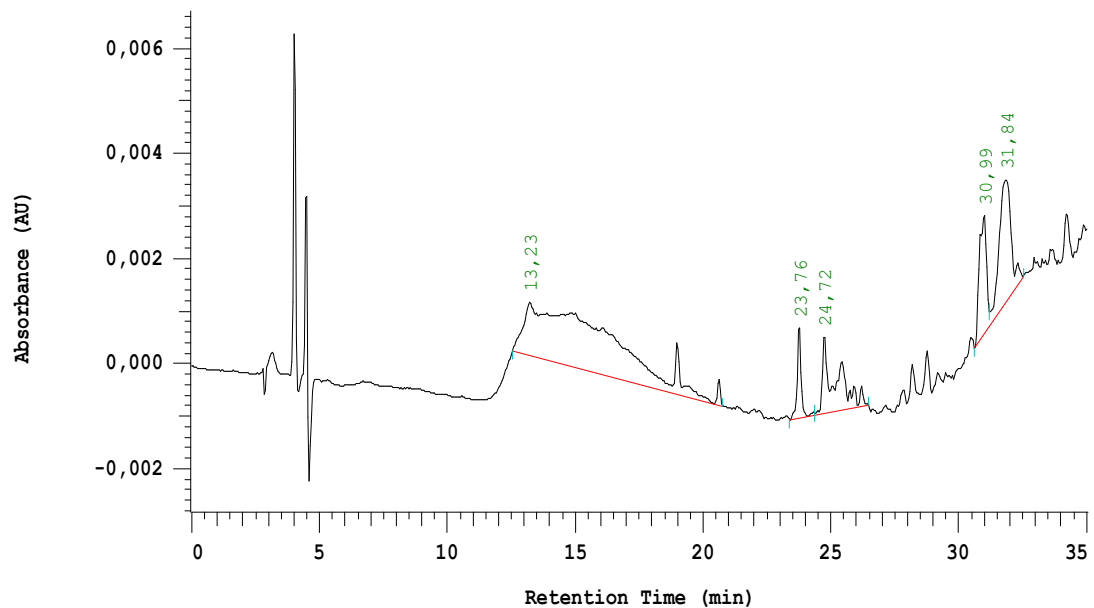

**Figure S9: Chromatogram of fraction 2E.** Chrom Type: Integrated Chromatogram between wavelengths 240 to 260 nm

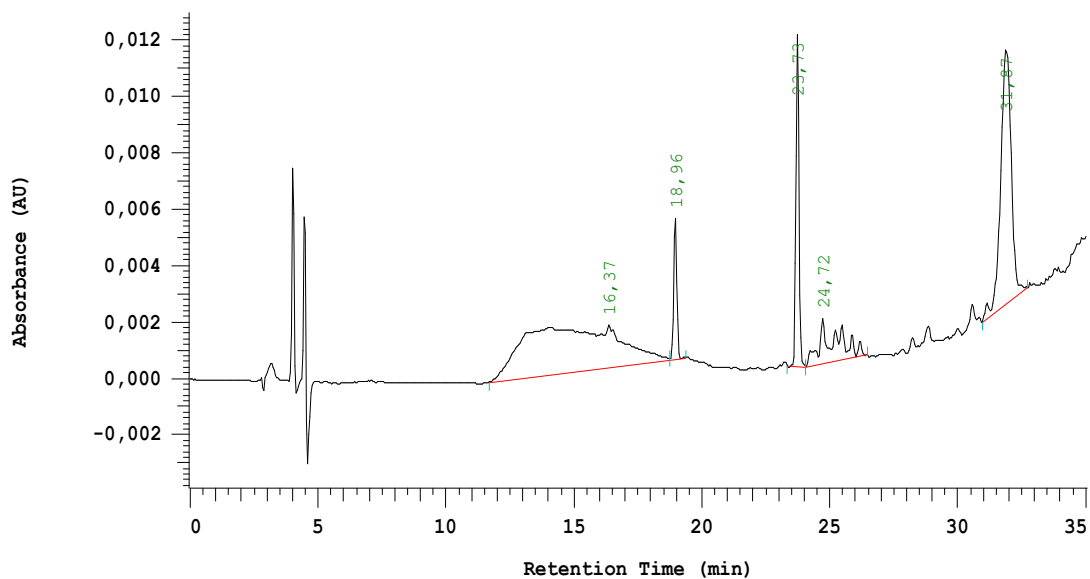

**Figure S10: Chromatogram of fraction 2F.** Chrom Type: Integrated Chromatogram between wavelengths 240 to 260 nm

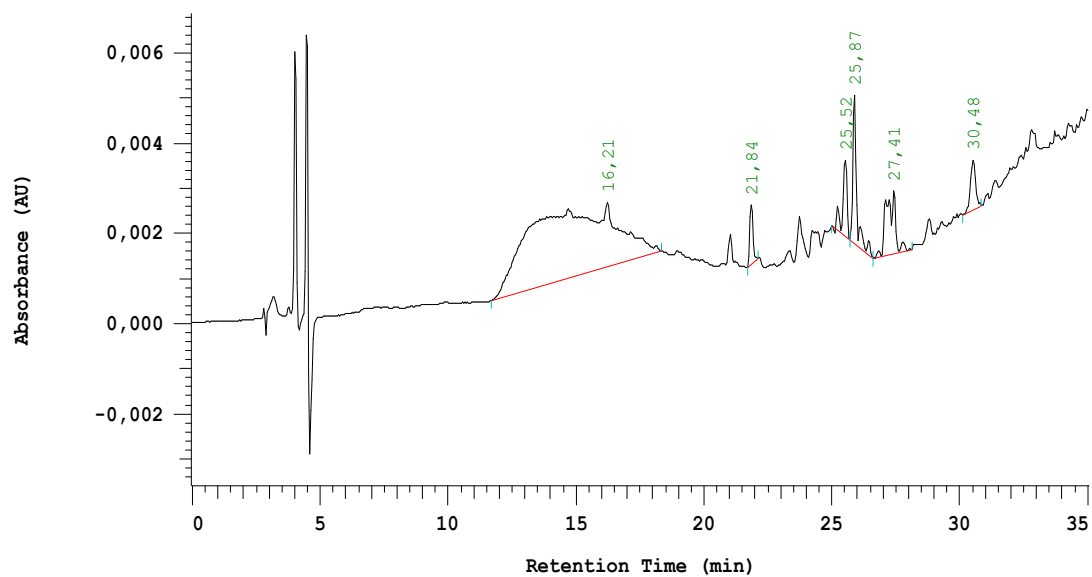

**Figure S11: Chromatogram of fraction 2G.** Chrom Type: Integrated Chromatogram between wavelengths 240 to 260 nm

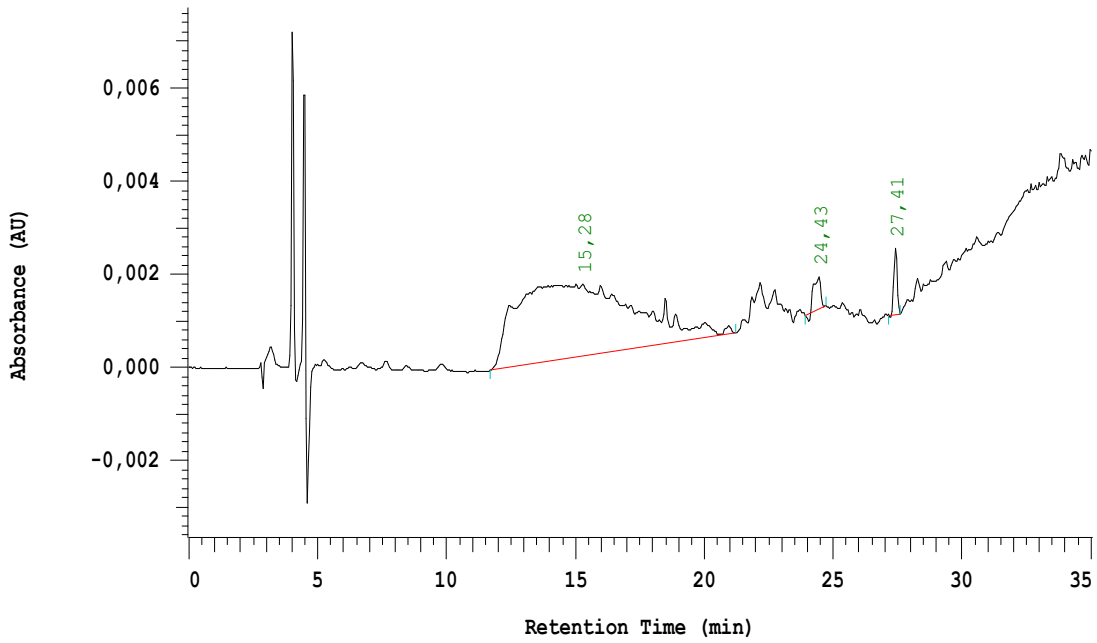

**Figure S12: Chromatogram of fraction 2H.** Chrom Type: Integrated Chromatogram between wavelengths 240 to 260 nm

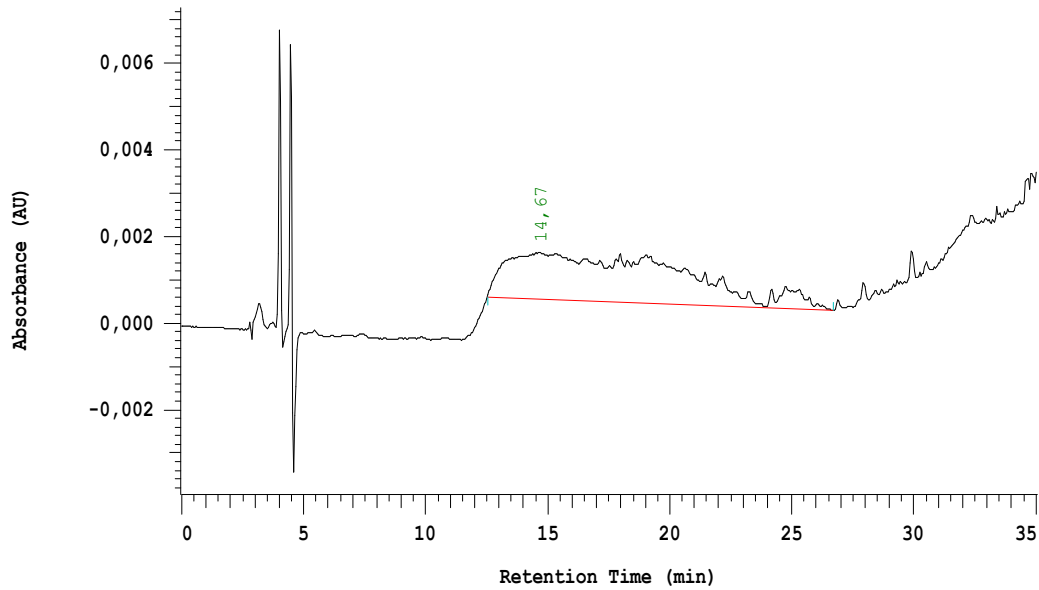

**Figure S13: Chromatogram of fraction 2I.** Chrom Type: Integrated Chromatogram between wavelengths 240 to 260 nm
